# Supplementary material for: Healthcare First: Delivering Immediate, Non-Contingent, and Coordinated Services Through the Street Medicine Model
Source: Research Square preprint supplement (doi:10.21203/rs.3.rs-8233628/v1), 2026-02-12
Supplement: Supplementary file 1 [file 0a713eafe93a0539b1ad3f5f.docx]

**Appendix B: Codebook**

| **Relationship with SM providers** (3) | Discussing how adaptations to clinical care to patient reality improves engagement, trust, and patient activation | Adapting clinical practice to psychologically align with the needs, readiness for change, priorities, and limitations/constraints of the patients served as well as providing services in patients’ home environment (encampments). | *“I feel very lucky. There is no other doctor who will come out here and do this for me.” (Jesse, Physician 2’s Patient)  “He’s a doctor who knows what we’ve done and what we’ve been through, and pretty much knows what we need” (Parker, Physician 2’s Patient).* |
| --- | --- | --- | --- |
|  | Identifying how consistency strengthens ontological security | Regular visits with street medicine patients on scheduled days; team members delivering services, care, or basic needs support as promised on a timely basis; responding to calls from patients.   Consistency in the relationship, service provision, and provision of basic needs. | *“I hardly had any visits to an actual clinic. I have no way to get there. With them, we come out here every Thursday because we know that is the day they come. I will specifically come because my case manager is coming here, and I can see the doctor if I need to.” (Patient 5, Physician 2’s Patient)* |
|  | Describing how clinicians non-judgmental approach improves trust, health disclosures, engagement, perceptions of competency with SM team as well as decreases the patient’s negative self-appraisal | Patients discuss how SM providers treat them with acceptance, empathy, and respect, without imposing personal biases, moral judgments, or assumptions about their circumstances, behaviors, or choices.  Non-judgmental attitudes toward limitations regarding hygiene, adherence to medical guidance, and substance use. | *“Because of the way I have been treated by him, I trust him. I trust what he tells me to do, and I know he cares. I know he won’t judge me if I wasn’t able to make an appointment or whatever” (Jordan, Physician 2’ Patient).  “I tell him things I have never told other people. I know that whatever I tell them, they won’t judge me and will help me through this” (Cameron, [determine SM team]).* |
| **Particularized Trust** (1) | Discussing how trusted members of the social network motivate them to overcome medical mistrust and engage in care with SM team | Street medicine patients reported that they placed trust in the recommendations of those residing in their encampments/friends to overcome their mistrust of healthcare services and interact with the SM team. | *“I was told by friends about them. They told me a doctor comes out here and is nice and will get you what you need. I said, ‘yeah right, f**k you.’ I went to see him anyway, and I have not seen another doctor besides him since then.” (Morgan, Physician 2’s Patient)* |
| **Limited Personal Health Literacy** (2) | Describing fear, stigma, and shame of interacting with clinicians and clinic settings | Street medicine patients reported experiencing health anxiety due to their previous negative experiences with traditional healthcare services and settings as well as limited understanding of health conditions.   Patients discuss experiences with social violence in traditional healthcare settings, which reinforces negative self-appraisal. | *“They actually give you the information you need, so that way it doesn’t make you* ***nervous*** *hearing all the stuff you haven’t taken care of” (Parker, Physician 2’s Patient)*  *“I’ve been ignoring having a mammogram done for nine years because I can’t understand what they are even asking me to do. I had* ***panic attacks*** *just thinking about going to the doctor.” (Taylor, Physician 2’s Patient)* |
|  | Understanding SM tx guidance due to accessible language | Street medicine patients expressed that they were more likely to follow through with treatment plans because street medicine teams explained the healthcare interventions in an accessible manner. | *“When the doctor explains why I need lab work for something, he tells me why I need it and how it’s going to get done, and I do it. Before I started seeing them, I didn’t try to do any lab work because no one told me why I needed it. I didn’t think it was important” (Riley, Physician 2’s Patient).* |
| **Overall Acceptability** (3) | Describing the effectiveness of medical care to address the complex care needs of PEH and as a form of empowerment | Street medicine patients believed that SM services meet healthcare needs and improve health outcomes. | *“He prescribed me the medication I needed, and now I feel much better” (Morgan, Physician 2’s Patient).*  *“It took almost dying for me to go to a clinic before seeing them. This is better for me” (Jesse, Physician 2’s Patient).  “Other people need this; this is something everyone should be able to get” (Jordan, Physician 2’s Patient).* |
|  | Expressing positive feelings about receiving SM services and preference for this service delivery model | SM patients expressed positive feelings about receiving street medicine services. | *“I am very happy with this. I wouldn’t have gotten my health under control without them” (Sam, Physician 2’s Patient).* |
|  | Experiencing heightened self-efficacy and patient activation | SM patients expressed their confidence that they can follow through with healthcare interventions outlined in their treatment plans from the SM team as well as their desire to improve their overall health. | *“When the doctor explains why I need lab work for something, he tells me why I need it and how it’s going to get done, and I do it.” (Riley, Physician 2’s Patient)* |
