# Supplementary material for: Healthcare First: Delivering Immediate, Non-Contingent, and Coordinated Services Through the Street Medicine Model
Source: Research Square preprint supplement (doi:10.21203/rs.3.rs-8233628/v1), 2026-02-12
Supplement: Supplementary file 2 [file 7326398506f066e9b11bbcbb.docx]

**Appendix A: Standards for Reporting Qualitative Research (SRQR)**

| No | Topic | Item |
| --- | --- | --- |
| **Title and abstract** | | |
|  | Title | Healthcare First: Delivering Immediate, Non-Contingent, and Coordinated Services Through the Street Medicine Model |
|  | Abstract | **Introduction** People experiencing homelessness (PEH) face disproportionate morbidity and mortality due to structural barriers that restrict healthcare access. Conventional health systems often exacerbate these inequities through conditional treatment models requiring readiness, compliance, or abstinence. Street medicine - interdisciplinary teams delivering care directly in community settings - has emerged as a critical response. Despite its growth, limited qualitative research explores patient perspectives on how street medicine structures care to counter systemic exclusion. This study examines the experiences of unhoused patients receiving street medicine care in Bakersfield, California.  **Methods** Between March and May 2025, we conducted 10 semi-structured interviews with individuals receiving street medicine services in Bakersfield, California. Eligible participants were aged ≥18, English-speaking, and had received care within six months. Using a constructivist grounded theory approach, interviews were audio-recorded, transcribed, and analyzed iteratively in ATLAS.ti. Coding and memo writing were used to develop a conceptual model describing how street medicine structures healthcare delivery and engagement.  **Results** Participants described street medicine as characterized by three interrelated mechanisms: (1) immediate, non-contingent access fostering trust and engagement; (2) integration of harm-reduction principles across medical and behavioral services; and (3) embedded navigation reframing adherence as a system-supported process. Collectively, these processes aligned with a Healthcare First model that parallels Housing First by emphasizing immediacy, choice, and voluntary engagement.  **Discussion** Street medicine reframed healthcare as a right rather than a conditional service, countering structural exclusion through accessibility, consistency, and dignity. Findings underscore the importance of institutionalizing Healthcare First principles to promote equity and continuity of care for PEH. |
| **Introduction** | | |
|  | Problem formulation | This paper explores how street medicine services promote patient engagement, activation, and adherence to treatment interventions among PEH. |
|  | Purpose or research question | This research was intended to understand PEH’s experiences and satisfaction with street medicine services, the role of street medicine services in their engagement and adherence with healthcare interventions, and the elements of street medicine service delivery which support patients to overcome medical mistrust. |
| **Methods** | | |
|  | Qualitative approach and research paradigm | Novel use of qualitative study design was used to study how street medicine aligned with a Healthcare First approach to providing medical and behavioral health services, empowering them to improve their health and well-being.  Constructivist grounded theory was used for data collection and analysis throughout the study. |
|  | Researcher characteristics and reflexivity | P.B. has an MSW  A.N.S.H. has a PhD and MSW  S.S.G. has a PhD  B.C. has a PhD  R.N.B. has a PhD  S.S.G. and R.N.B. are affiliated with USC; P.B. and A.N.S.H. are affiliated with CSUB; B.C. is affiliated with CSU: A.N.S.H., B.C., and R.N.B. are faculty members, S.S.G. is a postdoctoral researcher; P.B. is a former master’s student and research associate.  P.B. and A.N.S.H. reside in Bakersfield and refer syringe service program participants to local street medicine teams and maintain professional relationships with these teams.  There was no prior relationship with participants in this study. |
|  | Context | Data was collected via phone as well as in-person during street medicine rounds in Bakersfield, California, between March and May 2025. In-person interviews were conducted on one of the street medicine rotation routes in Bakersfield, California. |
|  | Sampling strategy | We used convenience sampling from local street medicine teams. |
|  | Ethical issues pertaining to human subjects | Research was approved by CSUB HSIRB (Study ID: 25-105).  Written informed consent was provided before interviews. |
|  | Data collection methods | Qualitative, semi-structured, one-on-one interviews with PB were conducted from March 2025 to May 2025. |
|  | Data collections instruments and technology | Interviews were conducted in-person and over the phone using a voice recorder for later transcription. |
|  | Units of study | We recruited and interviewed 10 PEUH who received services from a street medicine team. |
|  | Data processing | Transcriptions of interviews were conducted through Otter.ai and verified by an external transcriber who manually anonymized the interviews by removing identifying information about participants including names, cities, etc. Data integrity was verified by comparing audio from the interview to the transcription developed by Otter.ai. Inconsistencies were edited accordingly. |
|  | Data analysis | ATLAS.ti was used to code themes and conduct the analysis. |
|  | Techniques to enhance trustworthiness | We engaged in discussions of how codes were being interpreted by researchers to generate memos and compare observations, deviations, and track emerging ideas that would facilitate the development of theoretical concepts. These weekly analytic meetings spanned 2-3 hours per week for over 4 weeks and allowed us to engage in reflexive discussions, triangulate ideas between researchers, and construct the theories we were reporting. |
| **Results/ findings** | | |
|  | Synthesis and interpretation | Patients highlighted the specific elements of this practice model that made it acceptable to them, including that street medicine: 1) provided immediate and noncontingent access to healthcare, 2) integrated a harm reduction approach into the provision of healthcare, and 3) provided integrated case management services to support recovery and health goals, whereas the treatment as usual model stood in opposition to this practice framework. |
|  | Links to empirical data | This work uses participant quotes to link findings to the data. The following quotes are findings from various participants describing how street medicine aligns with a Healthcare First approach to care, providing immediate, non-contingent, and integrated care to improve engagement and adherence.   1. “I used to never go. In the beginning, I never went to the appointments he told me about.   Now, I make every appointment. He was never upset with me that I missed appointments. He would tell me I really needed to go. He would keep reassuring me that I needed to do these things in order to get better. So, now, I make sure I do.” - Carmen   1. “They were very kind, and they were open to anything. I had to talk about it [using fentanyl], but they didn't seem bothered by [my drug use]… I was taking the shot (long-acting injectable buprenorphine) out there on the streets. They got me on that. But it’s just too hard on the streets. It's so hard trying to get sober when you’re on the streets.” – Aliyah 2. “It's so much easier having them make appointments for you and figuring out how to get there. Lots of people out here don’t have phones, so it’s not like we can call and make an appointment for ourselves. And if you need a different doctor or something else [specialist care], they can help you get to that.” - Robert |
| **Discussion** | | |
|  | Integration with prior work, implications, transferability, and contributions to the field | It yields important knowledge about how street medicine supports unhoused patients through a Healthcare First approach to improve engagement and adherence from the perspective of those most affected and with constructivist grounded theory. |
|  | Limitations | Findings may not be generalizable to other geographical locations, as it only included street medicine patients in Bakersfield, California. Additionally, the sample lacked representation of the diverse racial and ethnic backgrounds of people experiencing unsheltered homelessness across the United States. As the theme of intersectional and gendered vulnerability emerged from participants’ narratives, further research is warranted to examine how overlapping social positions - such as gender, race, and housing status - shape barriers to engaging with street medicine services. |
| **Other** | | |
|  | Conflicts of interest | The authors do not have any conflicts of interest to report. |
|  | Funding | The study was funded by the Student Research Scholars program at California State University, Bakersfield (CSUB) and NIDA 3R01DA055673-03S1 and 1R15DA064537-01. CSUB and the National Institute on Drug Abuse had no role in the design and conduct of the study; collection, management, analysis, and interpretation of the data, preparation, review, or approval of the manuscript, nor decision to submit the manuscript for publication. |
