# Supplementary material for: Healthcare First: Delivering Immediate, Non-Contingent, and Coordinated Services Through the Street Medicine Model
Source: Research Square preprint supplement (doi:10.21203/rs.3.rs-8233628/v1), 2026-02-12
Supplement: Supplementary file 3 [file 8c0e5ac70fe981839be14051.docx]

**Appendix A: Semi-Structured Interview Guide**

| ***Warm up*** | Can you talk me through how you got connected with the [insert name of doctor] and the street medicine team? |
| --- | --- |
| *Affective Attitude: How an individual feels about the intervention, after taking part* | How did you feel while receiving services from the street medicine team?  ***Probes:***  *With the doctor? Case manager? Behavioral health provider/therapist?*  *How did you feel after the visit – physically? Emotionally?* |
| *Burden: The amount of effort that was required to participate in the intervention* | How much effort, time, or difficulty does it take for you to get care from the street medicine team?  ***Probe:*** *Did you experience any (other) burden(s) because you received care from the street medicine team*? |
| *Perceived Effectiveness: The extent to which the intervention is perceived to have achieved its intended purpose* | Do you think receiving services from the street medicine has been effective for you? (*Consider medical, case management and behavioral health*)  ***Probes:***  *What weren’t you able to do prior to working with the street medicine team that was important to you?   Are you able to do this now?* |
| *Intervention Coherence: The extent to which the participant understands the intervention and how it works* | Some health professionals think that it may be good for patients to receive care where they live (like when Dr. X comes to where you stay). What do you think about that? |
| *Opportunity Cost: Experienced opportunity cost: The benefits, profits or values that were given up to engage in the intervention* | Was there anything that you had to give up so that you could receive services from the street medicine team?  ***Probes:***  *Before working with the street medicine team?*  *During your visits with the street medicine team?* |
| *Self-efficacy: The participant’s confidence that they can perform the behaviour(s) required to participate in the intervention* | How confident were you that you could follow the recommendations of the street medicine team after your visits? (*Consider medical, case management, and behavioral health*) |
| *Ethicality: The extent to which the intervention has good fit with an individual’s value system* | Do you think there are any ethical issues with providing street medicine services (versus services in an office-based clinic)?  ***Probe:*** *In what ways do you think receiving street medicine services is fair or not fair?* |
| *Satisfaction:* | How satisfied were you with the street medicine team? *(Consider medical providers as well as case management staff)* ***Probe:*** *What do you like most about their care, and what could be improved?* |
| *Accessibility:* | How easy or difficult is it for you to receive care from the street medicine team when you need it? (*Considering factors like location, timing, and the way services are provided*)  ***Probe:*** *What could make it easier for you to get care from them?* |
| ***Closing*** | Thank you for giving me lots of fantastic information. Can I ask you now to think about overall, when considering all the things you’ve spoken about, what do you think about your experience with the street medicine team?  ***Probes:***  *Is there anything that you think could be done better?*  *Is there anything else you’d like to tell us?* |
